# Supplementary material for: An overlooked poultry trade network of the smallholder farms in the border provinces of Thailand, 2021: implications for avian influenza surveillance
Source: Front Vet Sci. 2024 Feb 7;11:1301513. doi: 10.3389/fvets.2024.1301513 (PMC10879335; doi:10.3389/fvets.2024.1301513)
Supplement: Supplementary file 1 [file Table_1.XLSX]

## Sheet: All-degree centrality
Geocode	All-degree centrality
490108	18
480107	16
480101	15
490101	15
490105	14
342501	13
342505	12
480112	12
342502	11
342506	11
480109	11
342504	10
480113	10
342503	9
480103	9
480110	9
480115	9
480108	8
490102	8
490110	8
490112	7
490113	6
480102	5
480111	5
490103	5
490107	5
480106	4
490104	4
200101	3
400101	3
480104	3
480114	3
480601	3
490106	3
490109	3
210101	2
301401	2
341901	2
341904	2
480105	2
480701	2
490111	2
770101	2
100101	1
100302	1
101701	1
103604	1
110301	1
200206	1
210102	1
240901	1
250201	1
300101	1
312008	1
320501	1
320518	1
340105	1
340108	1
340301	1
340401	1
340701	1
340704	1
340713	1
341905	1
341909	1
341914	1
370113	1
400602	1
402103	1
430101	1
440101	1
471221	1
480302	1
480304	1
480311	1
480401	1
480501	1
480502	1
480507	1
480511	1
480702	1
480801	1
480901	1
490201	1
490203	1
490301	1
490303	1
490306	1
490505	1
490705	1
490601	1
490401	1
490504	1
510101	1
540101	1
700301	1
720701	1
730101	1
LAOS	1

## Sheet: In-degree centrality
Geocode	In-degree centrality
490101	11
490108	11
342502	8
480101	8
480107	8
480109	8
490105	8
342501	7
342503	7
342506	7
480103	7
342504	6
480112	6
342505	5
480113	5
480115	5
480108	4
480110	4
490102	4
490103	4
490110	4
480102	3
480111	3
490107	3
490113	3
480114	2
490104	2
490106	2
490112	2
210101	1
301401	1
340704	1
341901	1
341905	1
341914	1
400101	1
480104	1
480105	1
480106	1
480302	1
480501	1
480601	1
480701	1
480801	1
490109	1
490111	1
490203	1
490505	1
730101	1
LAOS	1
440101	1
490401	1
490504	1
100101	0
100302	0
101701	0
103604	0
110301	0
200101	0
200206	0
210102	0
240901	0
250201	0
300101	0
312008	0
320501	0
320518	0
340105	0
340108	0
340301	0
340401	0
340701	0
340713	0
341904	0
341909	0
370113	0
400602	0
402103	0
430101	0
471221	0
480304	0
480311	0
480401	0
480502	0
480507	0
480511	0
480702	0
480901	0
490201	0
490301	0
490303	0
490306	0
490601	0
490705	0
510101	0
540101	0
700301	0
720701	0
770101	0

## Sheet: Out-degree centrality
Geocode	Out-degree centrality
480107	8
342505	7
480101	7
490108	7
342501	6
480112	6
490105	6
480110	5
480113	5
490112	5
342504	4
342506	4
480108	4
480115	4
490101	4
490102	4
490110	4
200101	3
342502	3
480106	3
480109	3
490113	3
341904	2
342503	2
400101	2
480102	2
480103	2
480104	2
480111	2
480601	2
490104	2
490107	2
490109	2
770101	2
100101	1
100302	1
101701	1
103604	1
110301	1
200206	1
210101	1
210102	1
240901	1
250201	1
300101	1
301401	1
312008	1
320501	1
320518	1
340105	1
340108	1
340301	1
340401	1
340701	1
340713	1
341901	1
341909	1
370113	1
400602	1
402103	1
430101	1
471221	1
480105	1
480114	1
480304	1
480311	1
480401	1
480502	1
480507	1
480511	1
480701	1
480702	1
480901	1
490103	1
490106	1
490111	1
490201	1
490301	1
490303	1
490306	1
490705	1
510101	1
540101	1
700301	1
720701	1
490601	1
340704	0
341905	0
341914	0
440101	0
480302	0
480501	0
480801	0
490203	0
490504	0
490505	0
490401	0
730101	0
LAOS	0

## Sheet: Betweenness centrality
Geocode	Betweeness centrality
490108	1110
480108	834
480112	818
490105	771
480115	711
342503	639
400101	605
342505	584
480109	535
480101	499
480107	481
490101	381
342501	302
480110	202
490113	160
490110	150
480113	145
480103	134
342504	123
490102	88
490107	84
342502	78
480601	70
480111	60
342506	50
490104	33
490112	4
100101	0
100302	0
101701	0
103604	0
110301	0
200101	0
200206	0
210101	0
210102	0
240901	0
250201	0
300101	0
301401	0
312008	0
320501	0
320518	0
340105	0
340108	0
340301	0
340401	0
340701	0
340704	0
340713	0
341901	0
341904	0
341905	0
341909	0
341914	0
370113	0
400602	0
402103	0
430101	0
440101	0
471221	0
480102	0
480104	0
480105	0
480106	0
480114	0
480302	0
480304	0
480311	0
480401	0
480501	0
480502	0
480507	0
480511	0
480701	0
480702	0
480801	0
480901	0
490103	0
490106	0
490109	0
490111	0
490201	0
490203	0
490301	0
490303	0
490306	0
490401	0
490504	0
490505	0
490601	0
490705	0
510101	0
540101	0
700301	0
720701	0
730101	0
770101	0
LAOS	0
